# Supplementary material
Source: PubMed Central journal article supplement (PMC5616101)
Supplement: nn7b03402_si_001.pdf [file nn7b03402_si_001.pdf]

# Supporting Information

## Structural Characterization of Bio-Functionalized Gold Nanoparticles by Ultrahigh Resolution Mass Spectrometry

Simone Nicolardi<sup>1\*</sup>, Yuri E.M. van der Burgt<sup>1</sup>, Jeroen D.C. Codée<sup>2</sup>, Manfred Wuhrer<sup>1</sup>,  
Cornelis H. Hokke<sup>3</sup>, Fabrizio Chiodo<sup>2,3\*</sup>.

1. Center for Proteomics and Metabolomics, Leiden University Medical Center, Leiden, The Netherlands

2. Department of Bio-Organic Synthesis, Leiden Institute of Chemistry, Leiden, The Netherlands

3. Department of Parasitology, Leiden University Medical Center, Leiden, The Netherlands

### Table of contents

|            |                                                                                                 |     |
|------------|-------------------------------------------------------------------------------------------------|-----|
| Figure S1  | LDI- and LDI/MALDI-TOF MS of OVA peptide AuNPs                                                  | S2  |
| Figure S2  | MS/MS analysis of AuNPs with OVA 323–339 peptide-based ligand                                   | S3  |
| Figure S3  | Scheme of b-type and y-type fragmentation during CID                                            | S4  |
| Figure S4  | MS/MS spectra of $[M-SH_2+H]^+$ (A) and $[M-S+H]^+$ (B) generated from OVA peptide AuNPs        | S5  |
| Figure S5  | MS/MS spectrum of the OVA peptide ligand linked to the glucose ligand via a S-S bond            | S6  |
| Figure S6  | MS analysis of OVA peptide AuNPs using either 1,5-DAN (A) or sinapinic acid (B) as MALDI matrix | S7  |
| Figure S7  | MS/MS analysis of pseudo-molecular ions (A-H) generated from Glu-C digested OVA peptide AuNPs   | S8  |
| Figure S8  | MS/MS analysis of pseudo-molecular ions (A-E) generated from Lewis X AuNPs                      | S9  |
| Figure S9  | MS analysis of Lewis X ligand not linked to AuNPs                                               | S10 |
| Figure S10 | MS/MS analysis of pseudo-molecular ions (A-B) generated from tetramannoside AuNPs               | S11 |
| Figure S11 | MS spectrum of tetramannoside AuNPs analysed without NaCl                                       | S12 |
|            | Experimental conditions for the synthesis of each NP and supporting structural information.     | S13 |

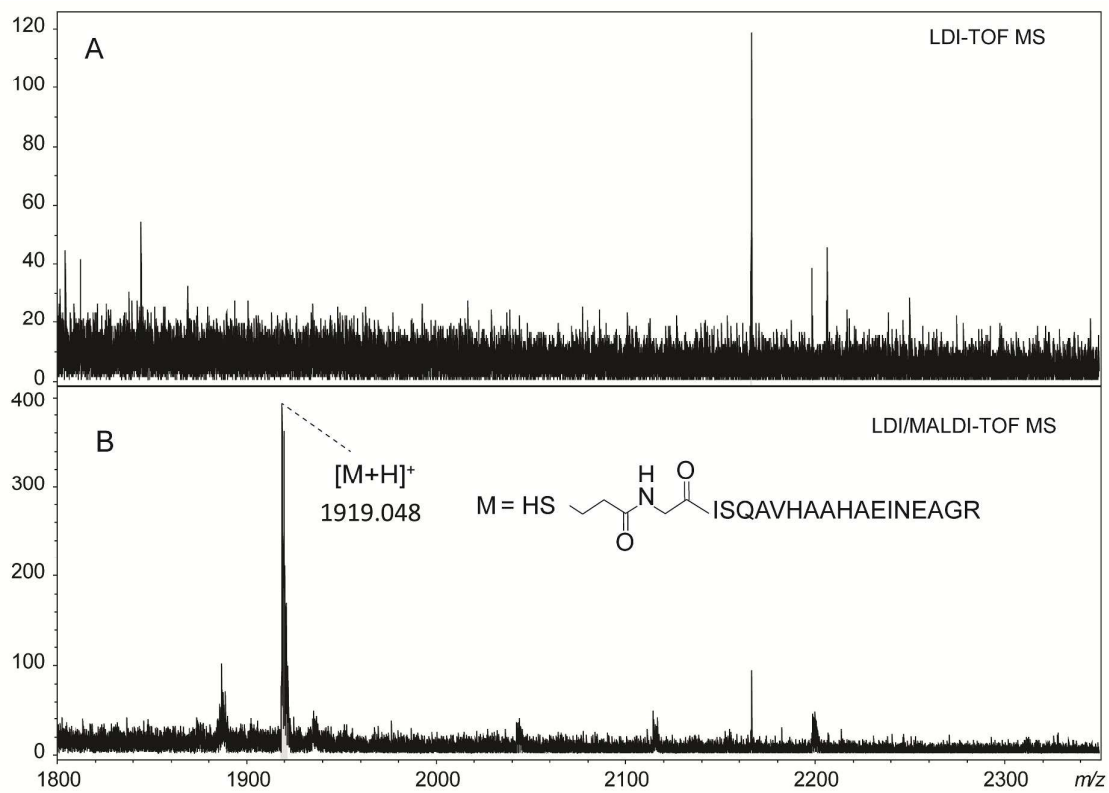

**Figure S1.** Relevant parts of the TOF mass spectra of AuNPs with OVA 323–339 peptide-based ligand obtained from LDI only (A) and LDI/MALDI (B).

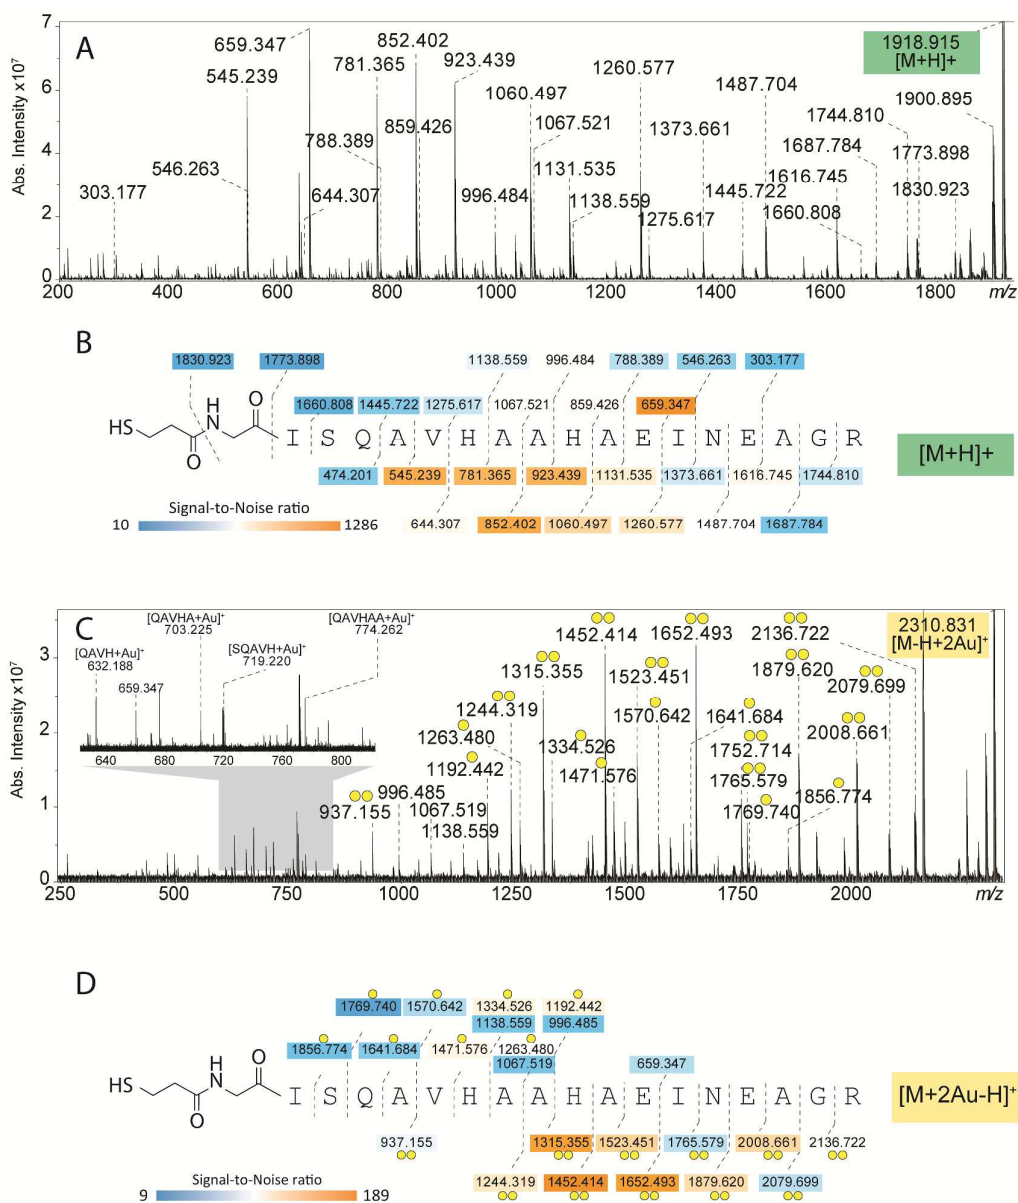

**Figure S2.** MS/MS analysis of AuNPs with OVA 323–339 peptide-based ligand. Structure characterization of  $[M+H]^+$  and  $[M+2Au-H]^+$  by collision-induced dissociation (CID) resulted in tandem mass spectra A and C with corresponding sequence coverages depicted in B and D.

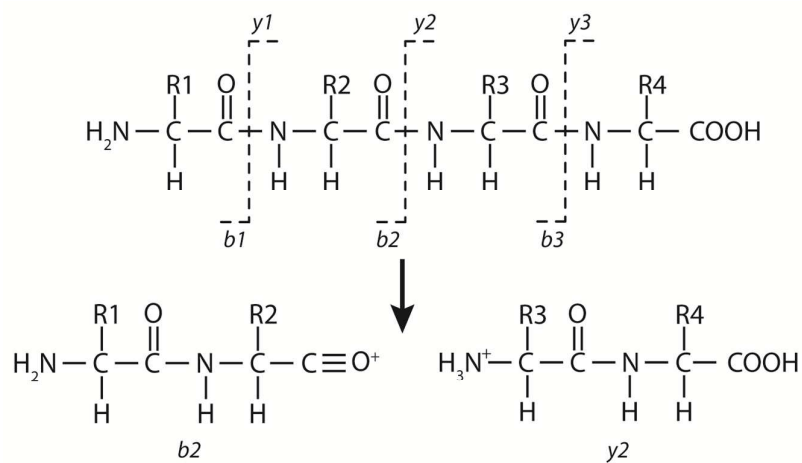

**Figure S3.** During CID, b-type and y-type fragments are generated from the cleavage of the peptide bond. If the charge is retained on the C-terminal part, y-type ions are formed while if the charge is retained on the N-terminal part, b-type ions are formed (Klaus Biemann *Biological Mass Spectrometry* 1988, 16, 99-111).

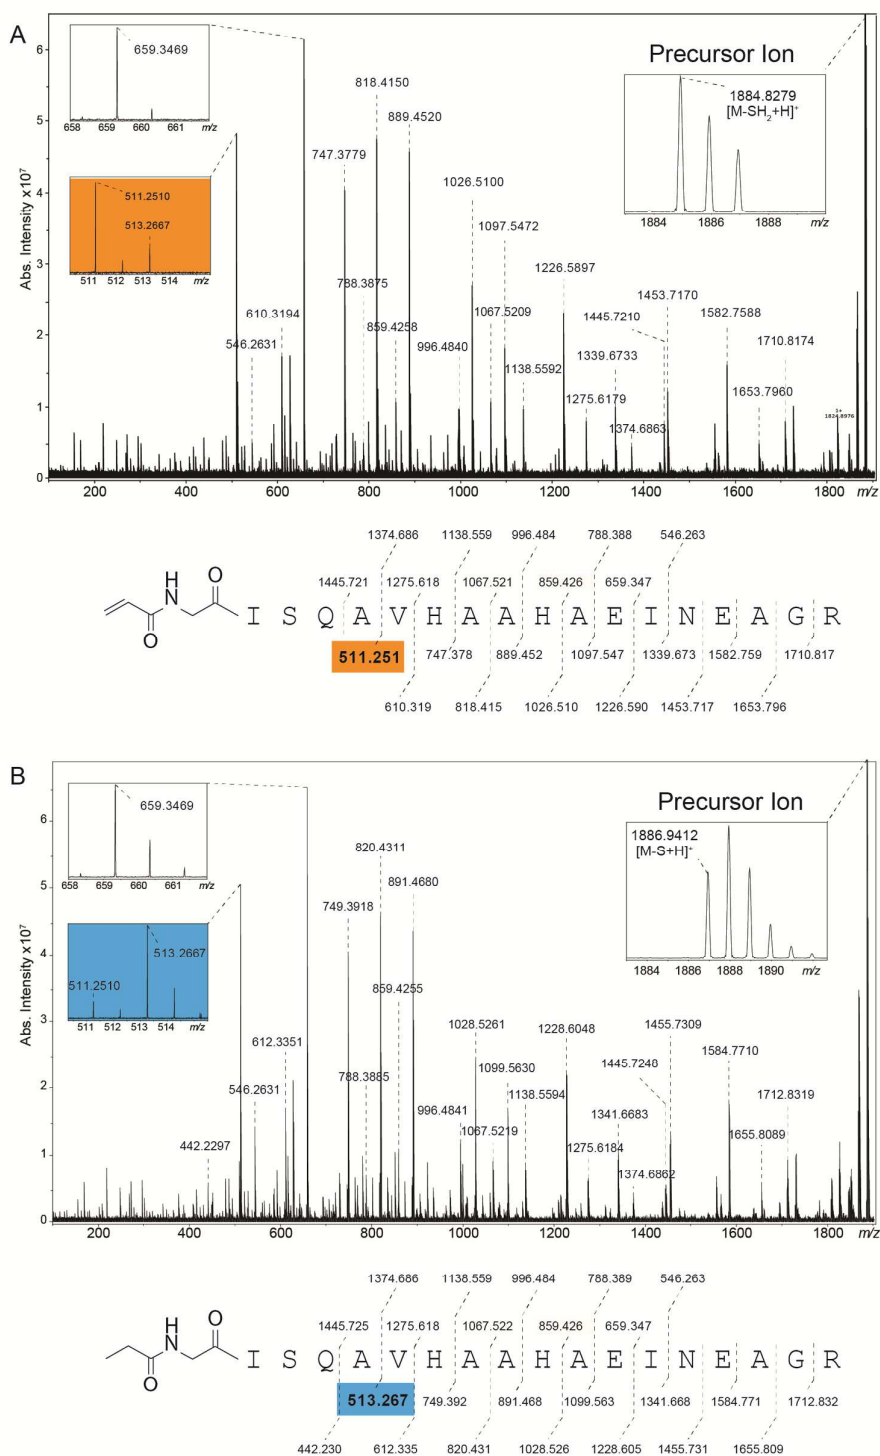

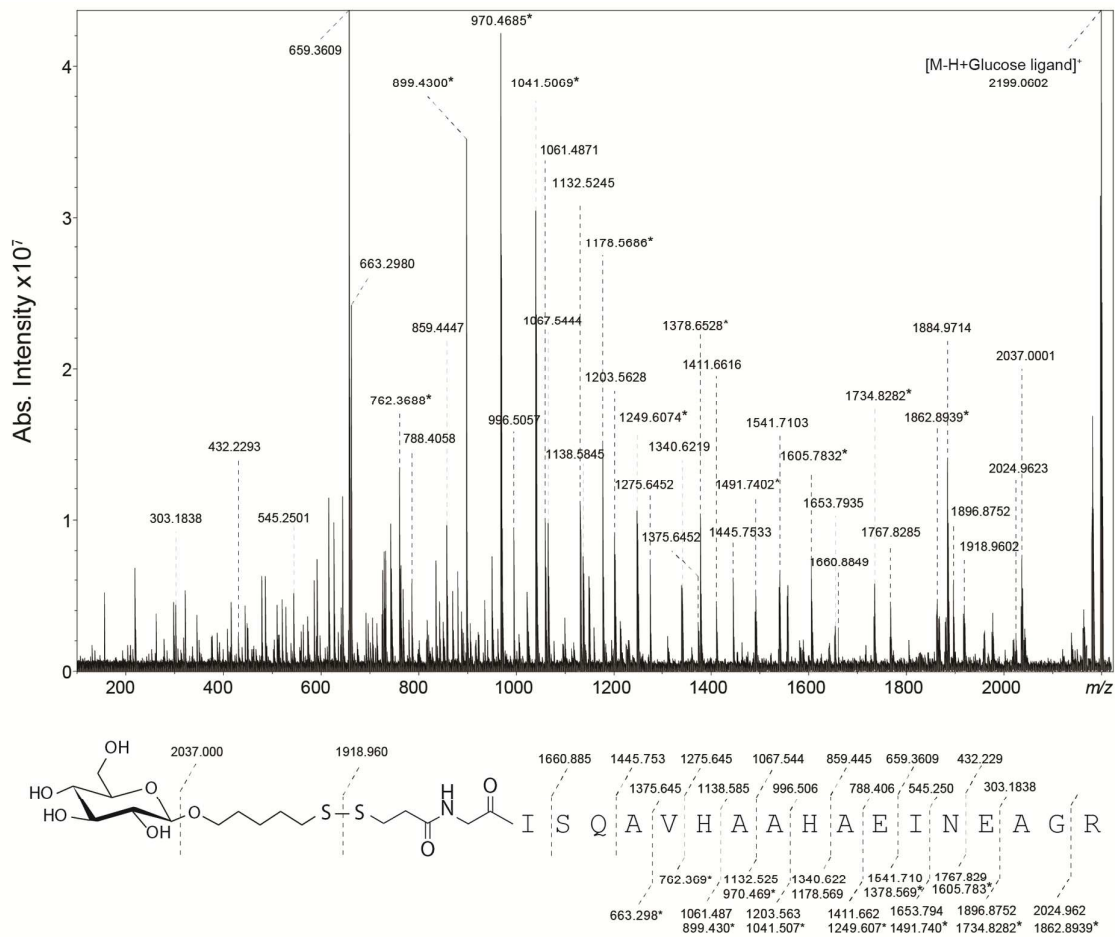

**Figure S5.** LDI/MALDI-CID-FTICR MS/MS spectrum of the OVA peptide ligand linked to the glucose ligand via a S-S bond. \* Internal fragments without glucose.

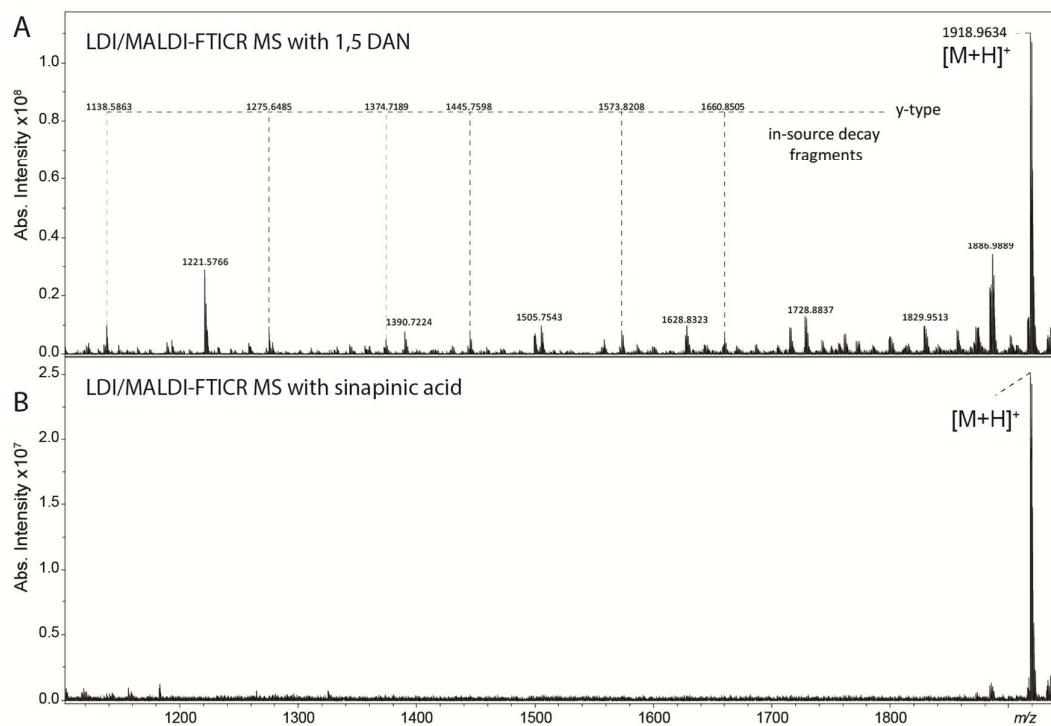

**Figure S6.** LDI/MALDI-FTICR MS spectra generated from the analysis of OVA peptide AuNPs using either 1,5-DAN (A) or sinapinic acid (B) as MALDI matrix.

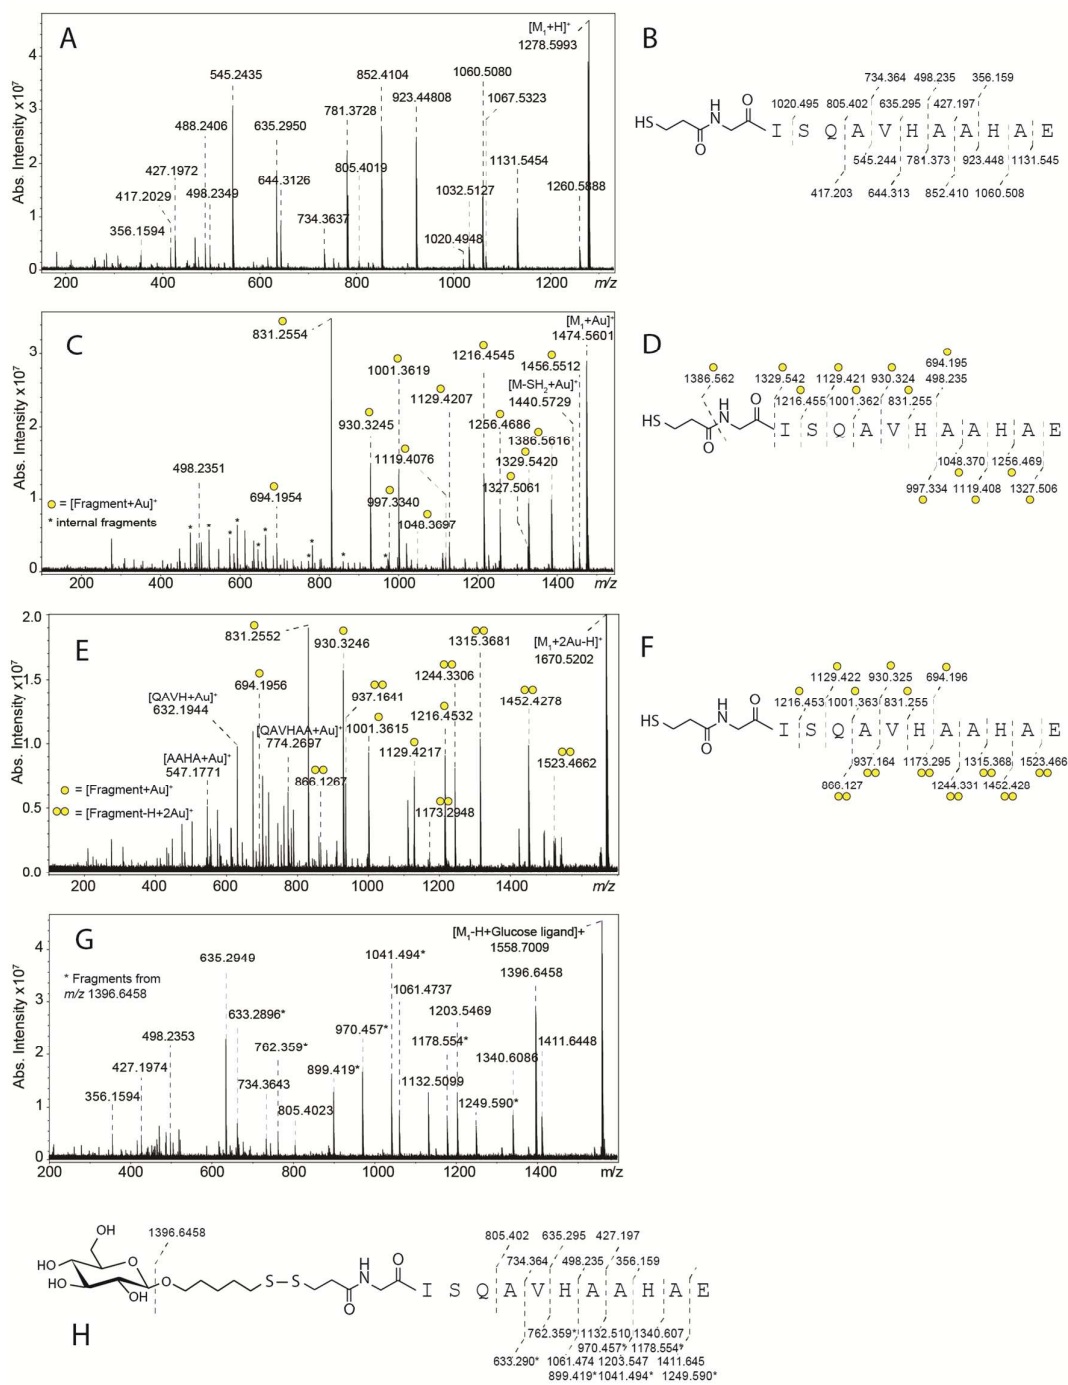

**Figure S7.** LDI/MALDI-CID-FTICR MS/MS spectra and sequence coverage obtained from (A, B)  $[M_1+H]^+$ , (C, D)  $[M_1+Au]^+$ , (E, F)  $[M_1+2Au-H]^+$  and (G, H)  $[M_1-H+Glucose\ ligand]^+$  generated by LDI/MALDI-FTICR MS of Glu-C digested OVA peptide AuNPs. Yellow circles indicate gold-linked fragment ions.



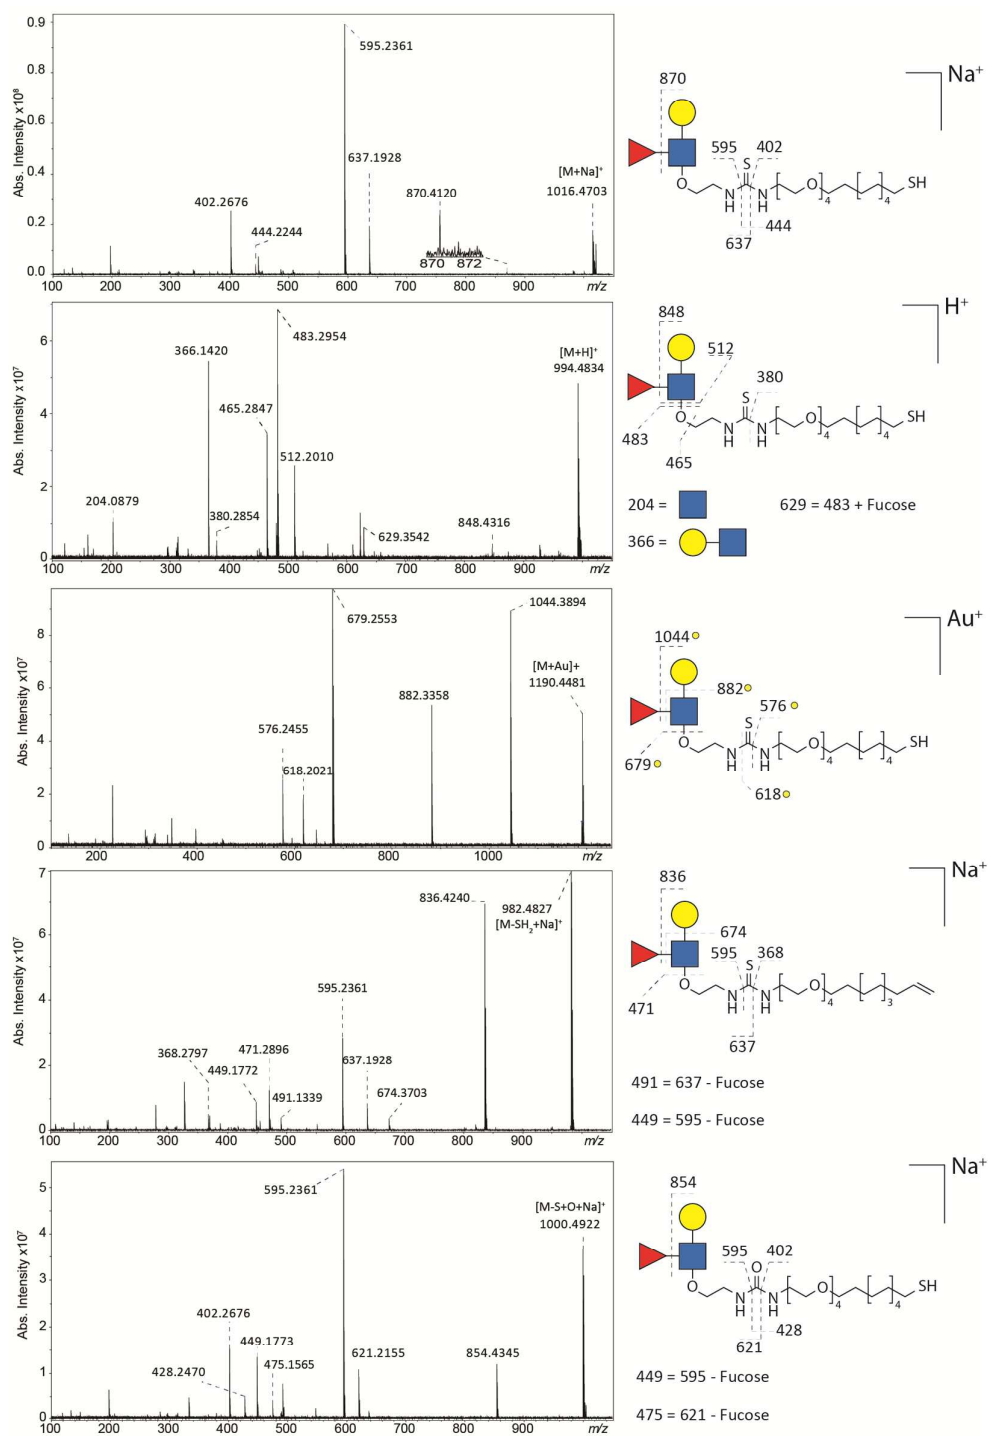

**Figure S8.** LDI/MALDI-CID-FTICR MS/MS spectra and structural characterization of (A)  $[M+Na]^+$ , (B)  $[M+H]^+$ , (C)  $[M+Au]^+$ , (D)  $[M-SH_2+Na]^+$  and (E)  $[M-S+O+Na]^+$  generated by LDI/MALDI-FTICR MS of Lewis X AuNPs. Yellow circles indicate gold-linked fragment ions.

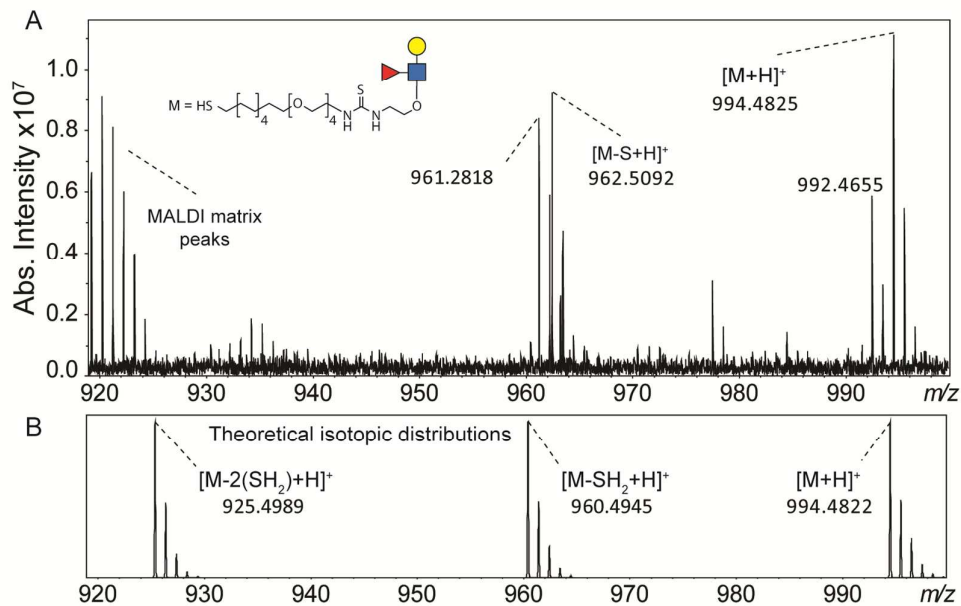

**Figure S9.** MALDI-FTICR spectrum of Lewis X ligand not linked to AuNPs. Contrarily to what observed in the MALDI-FTICR spectrum of Lewis X AuNPs (see Figure 4), the single and the double loss of  $\text{SH}_2$  from  $[\text{M}+\text{H}]^+$  were not observed.

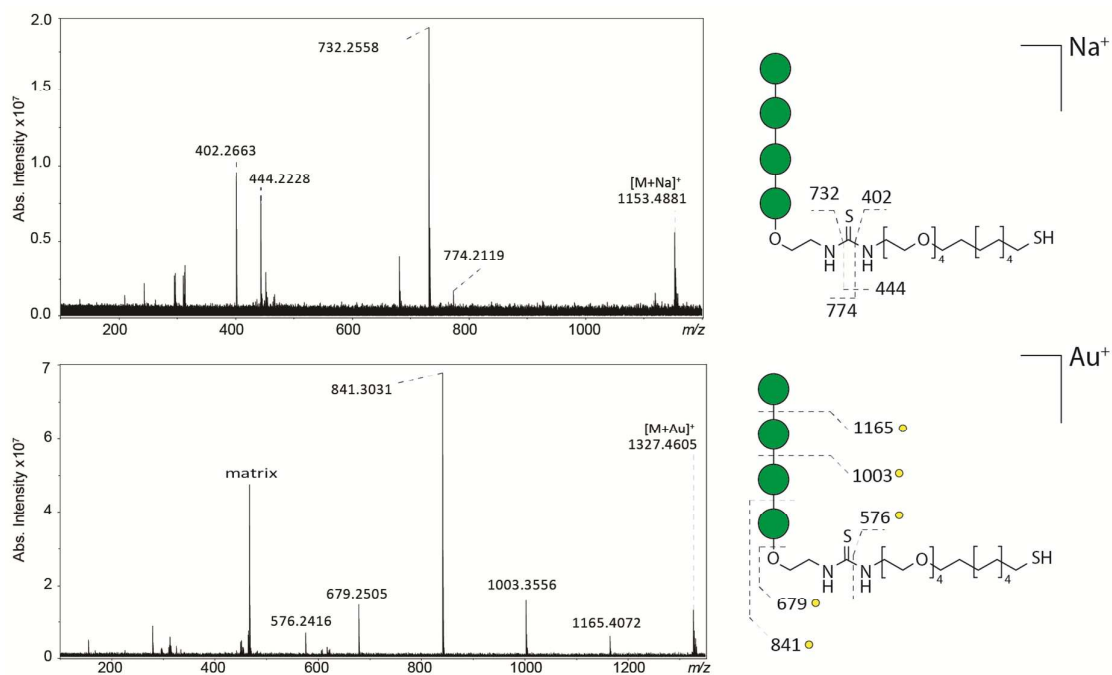

**Figure S10.** LDI/MALDI-CID-FTICR MS/MS spectra and structural characterization of  $[M+Na]^+$  (A) and  $[M+Au]^+$  (B), generated from tetramannoside AuNPs. Yellow circles indicate gold-linked fragment ions.

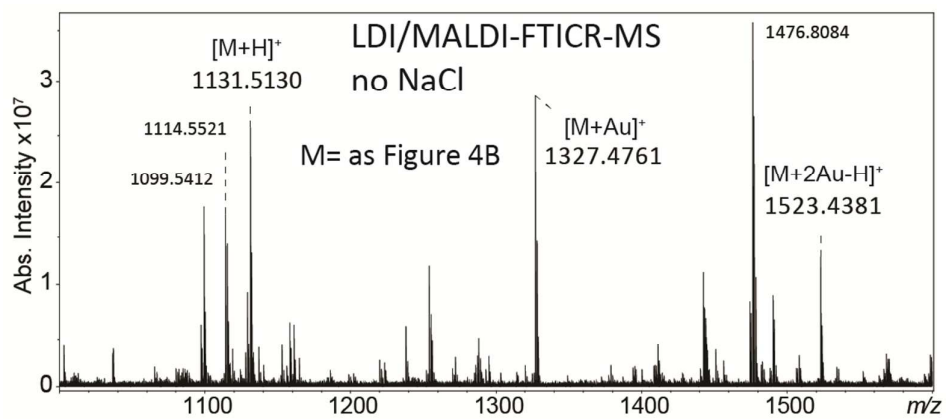

**Figure S11.** LDI/MALDI-FTICR MS spectrum of tetramannoside AuNPs analysed without NaCl.

**Detailed experimental conditions for the synthesis of each NP and supporting structural information.**

**Table 1.** Experimental conditions for the in situ reduction of HAuCl<sub>4</sub> for the preparation of AuNP.

| <b>OVA peptide AuNP</b>        | umoles | Concentration (M) | eq | Volume (uL) |
|--------------------------------|--------|-------------------|----|-------------|
| Organic (Thiol-ending ligands) | 1,44   | 0,012             | 3  | 120         |
| HAuCl <sub>4</sub>             | 0,48   | 0,025             | 1  | 19          |
| NaBH <sub>4</sub>              | 10     | 1                 | 21 | 10          |
| <b>LeX AuNP</b>                |        |                   |    |             |
| Organic (Thiol-ending ligands) | 20,11  | 0,012             | 3  | 1676        |
| HAuCl <sub>4</sub>             | 6,7    | 0,025             | 1  | 268         |
| NaBH <sub>4</sub>              | 141    | 1                 | 21 | 141         |
| <b>LeX/Tetramannoside AuNP</b> |        |                   |    |             |
| Organic (Thiol-ending ligands) | 5,9    | 0,012             | 3  | 492         |
| HAuCl <sub>4</sub>             | 1,97   | 0,025             | 1  | 79          |
| NaBH <sub>4</sub>              | 42     | 1                 | 21 | 42          |
| <b>Tetramannoside AuNP</b>     |        |                   |    |             |
| Organic (Thiol-ending ligands) | 17,7   | 0,012             | 3  | 1475        |
| HAuCl <sub>4</sub>             | 5,9    | 0,025             | 1  | 236         |
| NaBH <sub>4</sub>              | 124    | 1                 | 21 | 124         |

*AuNPs functionalized with both Lewis X and tetramannoside ligands.*

Reaction of a ~2:1:10 mixture of Lewis X conjugate (*i.e.* 0.6 μmoles), Tetramannoside conjugate (*i.e.* 0.3 μmoles) and GlcC5S (*i.e.* 5 μmoles) with HAuCl<sub>4</sub> and NaBH<sub>4</sub> gave AuNPs as a dark-brown powder. Ratio between Lewis X and Tetramannoside signals ~2:1. Molar ratio of conjugates per nanoparticle was also determined by analyzing the mixtures using NMR before and after nanoparticle formation. TEM (average diameter): 1.8±0.3 nm.

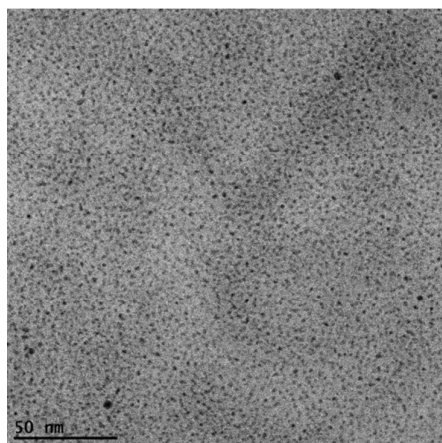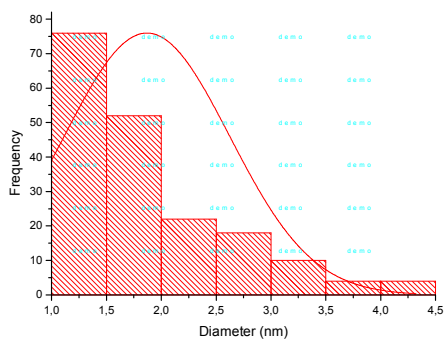

**Figure S12.** TEM micrograph and size-distribution histogram obtained from analysis of TEM micrographs.

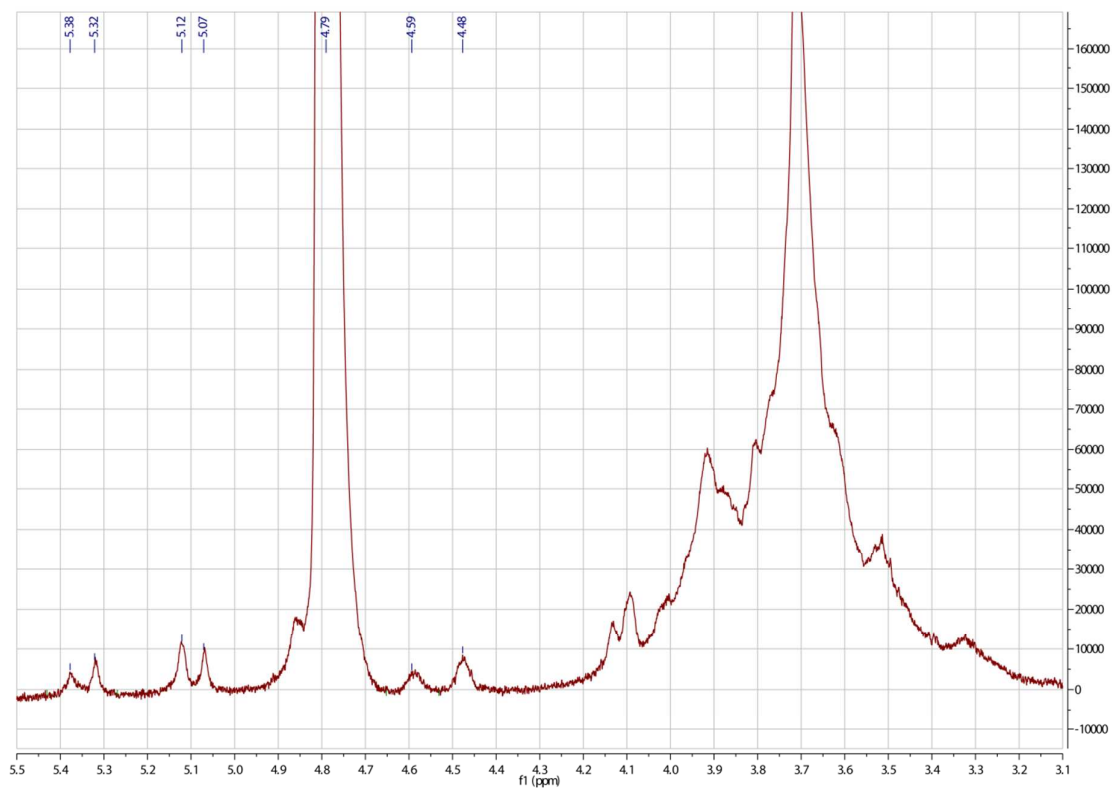

**Figure S13.** <sup>1</sup>H-NMR (500 MHz, D<sub>2</sub>O) of AuNPs functionalized with both Lewis X and tetramannoside ligands. Only significant peaks are reported:  $\delta$  = 5.38 (bs, from Tetramann anomeric proton), 5.32 (bs, from Tetramann anomeric proton), 5.12 (bs), 5.07 (bs), 4.59 (bs, from Lewis X anomeric proton), 4.48 (bs, from glucose anomeric proton), 2.05 (s, NAc of Lewis X conjugate), 1.20 (bs, fucose –CH<sub>3</sub> of Lewis X conjugate).

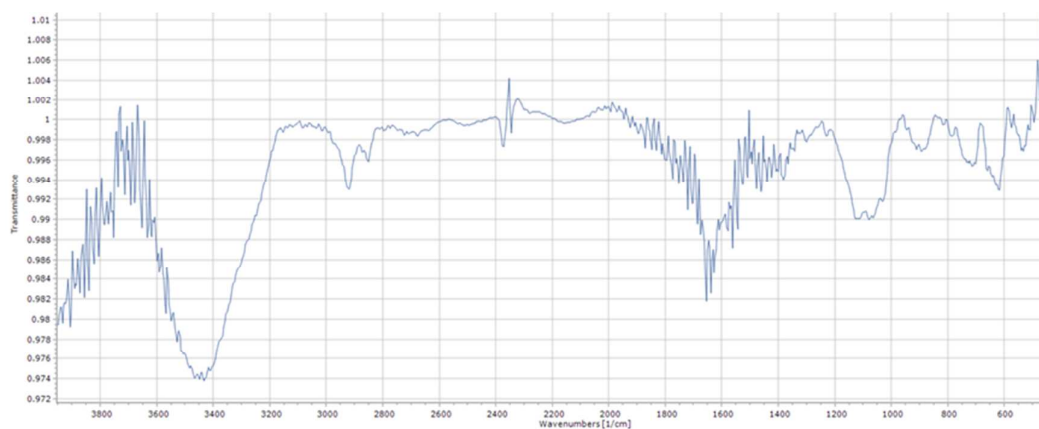

**Figure S14.** IR spectrum of Lewis X/tetramannoside AuNPs. IR (KBr):  $\nu$  =  $\sim$ 3600–3100 (br), 2906, 2845, 1638, 1094.

*AuNPs functionalized with Lewis X ligand.*

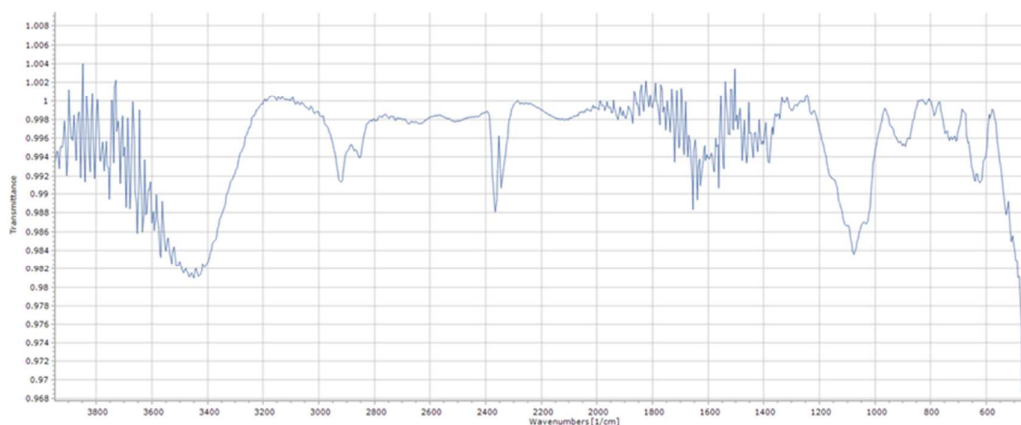

**Figure S15.** IR spectrum of Lewis X AuNPs. IR (KBr):  $\nu = \sim 3600\text{--}3100$  (br), 2919, 2848, 2365, 2343, 1654, 1381, 1069.

NMR, UV and TEM micrograph of Lewis X AuNPs have been already described in Arosio, D.; Chiodo, F.; Reina, J. J.; Marelli, M.; Penades, S.; van Kooyk, Y.; Garcia-Vallejo, J. J.; Bernardi, A., Effective Targeting of DC-SIGN by  $\alpha$ -Fucosylamide Functionalized Gold Nanoparticles. *Bioconjugate Chem.* 2014, 25 (12), 2244-2251.

*AuNPs functionalized with tetramannoside ligand.*

NMR, UV, IR and TEM micrograph of tetramannoside AuNPs have been already described in Di Gianvincenzo, P.; Chiodo, F.; Marradi, M.; Penades, S., Gold manno-glyconanoparticles for intervening in HIV gp120 carbohydrate-mediated processes. *Methods Enzymol.* 2012, 509, 21-40.

*AuNPs functionalized with OVA 323-339 ligand.*

NMR, UV, IR and TEM micrograph of OVA 323-339 AuNPs have been already described in Safari, D.; Marradi, M.; Chiodo, F.; Th Dekker, H. A.; Shan, Y.; Adamo, R.; Oscarson, S.; Rijkers, G. T.; Lahmann, M.; Kamerling, J. P.; Penades, S.; Snippe, H., Gold nanoparticles as carriers for a synthetic *Streptococcus pneumoniae* type 14 conjugate vaccine. *Nanomedicine-UK* 2012, 7 (5), 651-62.
